# Supplementary material for: Identification and validation of a glutamine metabolism-related gene signature as a diagnostic and therapeutic target in osteoarthritis through integrated multi-omics analysis
Source: PeerJ journal article supplement (doi:10.7717/peerj.20701), 2026-01-30
Supplement: MIQE_Checklist.docx [file MIQE_Checklist.docx]

**Supplementary Table 4.** MIQE Checklist

| ITEM TO CHECK | IMPORTANCE | CHECKLIST | WHERE; COMMENT |
| --- | --- | --- | --- |
| EXPERIMENTAL DESIGN |  |  |  |
| Definition of experimental and control groups | E | √ | Lines 134-136, 391-392: The experimental group consisted of 31 primary osteoarthritis (OA) patients, and the control group consisted of 31 demographically matched healthy volunteers. |
| Number within each group | E | √ | Lines 134-136, 391-392: 31 OA patients and 31 healthy controls. |
| SAMPLE |  |  |  |
| Description | E | √ | Lines 139, 220-221: Peripheral blood mononuclear cells (PBMCs). |
| Volume/mass of sample processed | D | √ | Line 220-221: Total RNA was extracted from approximately 2 × 10^6 PBMCs. |
| Microdissection or macrodissection | E |  | NA; Sample is a cell suspension. |
| Processing procedure | E | √ | Lines 139-140: PBMCs were isolated from peripheral blood using Ficoll-Paque PLUS density gradient centrifugation. |
| If frozen - how and how quickly? | E | √ | Line 142: Cells were either used immediately or cryopreserved in freezing medium. |
| If fixed - with what, how quickly? | E |  | NA; Samples were not fixed. |
| Sample storage conditions and duration | E | √ | Lines 142-143: Stored at –80°C for a period not exceeding 6 months before RNA extraction. |
| NUCLEIC ACID EXTRACTION |  |  |  |
| Procedure and/or instrumentation | E | √ | Lines 221-222: A TRIzol-based reagent was used for total RNA extraction. |
| Name of kit and details of any modifications | E | √ | Lines 221-222: A TRIzol-based reagent (SparkJade, China) was used. No modifications were mentioned. |
| Details of DNase treatment | E | √ | Line 222: RNA samples were treated with DNase I to remove genomic DNA. |
| NUCLEIC ACID QUALITY CONTROL |  |  |  |
| RNA quantity | D | √ | Line 224: Implied by the use of a specific starting amount (1 μg) for reverse transcription. |
| RNA purity (A260/280, A260/230) | E | √ | Lines 222-223: Purity was verified by spectrophotometry with defined ratio criteria (A260/A280: 1.8–2.0; A260/A230 > 1.8). |
| RNA integrity (e.g., RIN, gel) | E | √ | Lines 223-224: Integrity was verified by observing intact 18S/28S rRNA bands on a 1.5% agarose gel. |
| REVERSE TRANSCRIPTION (RT) |  |  |  |
| Amount of RNA and reaction volume | E | √ | Lines 224-225: 1 μg of total RNA was used in a 20 μL reaction. |
| Priming method (e.g., oligo(dT), random) | E | √ | Lines 225-226: An "All-in-One RT SuperMix" was used, which implies a standard mixture of oligo(dT) and random primers. |
| Name of kit/enzyme and manufacturer | E | √ | Lines 225-226: 2× SPARKscript II All-in-One RT SuperMix (SparkJade). |
| Temperature and time | E | √ | Lines 226-227: 25°C for 5 min, 42°C for 15 min, and 85°C for 5 s. |
| qPCR TARGET INFORMATION & OLIGONUCLEOTIDES |  |  |  |
| Gene symbols | E | √ | Lines 290, 328-329, 235: Target genes (F13A1, IRS2, RELA) and reference genes (B2M, YWHAZ) are specified. |
| Primer sequences | E | √ | Lines 229, 234: Primer sequences are referenced to be in Table 2. |
| Primer concentrations | E | √ | Line 229: 400 nM final concentration for each primer. |
| qPCR PROTOCOL |  |  |  |
| Instrument and reaction volume | E | √ | Lines 227-228: ABI 7500 System; 20 μL reaction volume. |
| Name of kit/master mix | E | √ | Line 228: SPARKscript II Master Mix (SYBR Green). |
| Complete thermocycling parameters | E | √ | Lines 229-231: Full parameters are provided (initial denaturation, 40 cycles with denaturation, annealing, and extension steps). |
| qPCR VALIDATION & QUALITY CONTROL |  |  |  |
| Amplification efficiency | E | √ | Lines 234-235: Confirmed to be between 95–105% for all primer pairs via standard curve analysis. |
| Specificity of amplification (e.g., melt curve) | E | √ | Lines 231-232: Product specificity was confirmed by melt curve analysis. |
| Negative controls (NTC, -RT) | E | √ | Lines 232-233: No-template and no-reverse-transcriptase controls were included and showed no amplification (Cq > 38). |
| Technical replicates | E | √ | Line 231: All reactions were run in triplicate. |
| DATA ANALYSIS |  |  |  |
| Cq determination method | D |  | Not specified; assumed to be the default setting of the ABI 7500 software. |
| Reference gene(s) selection and validation | E | √ | Lines 235-236: Two reference genes (B2M, YWHAZ) were used, and their stability was validated using the geNorm algorithm (M-value < 0.5). |
| Normalization method | E | √ | Lines 233, 235: The 2-ΔΔCT method was used, with normalization against the geometric mean of the two reference genes. |
| Statistical methods for analysis | E | √ | Lines 258-267: A dedicated "Statistical Analysis" section details the methods used for comparing groups. |
