# Supplementary material for: Identification and validation of a glutamine metabolism-related gene signature as a diagnostic and therapeutic target in osteoarthritis through integrated multi-omics analysis
Source: PeerJ journal article supplement (doi:10.7717/peerj.20701), 2026-01-30
Supplement: TableS1.docx [file TableS1.docx]

| **GEO ID** | **Tissue Type** | **Joint Location** | **Sample Size (OA/Control)** | **Platform** | **Key Description & Relevance** | **Dataset Type** |
| --- | --- | --- | --- | --- | --- | --- |
| GSE57218 | Articular Cartilage | Knee & Hip | 33 Paired Samples | Affymetrix Human Genome U133 Plus 2.0 | Paired analysis of OA-affected vs. preserved cartilage from the same joint. | Discovery |
| GSE55235 | Synovial Tissue | Multiple | 26 OA / 20 Control | Affymetrix HG-U133 A/B | Transcriptomic discrimination of RA vs. OA patients. | Discovery |
| GSE48556 | PBMCs1 | Systemic (Blood) | 28 OA / 28 Control | Affymetrix Human Genome U133 Plus 2.0 | Blood-based gene networks linked to OA pathogenesis. | Training |
| GSE51588 | Subchondral Bone | Knee | 20 OA / 5 Non-OA | Agilent-014850 Whole Human Genome Microarray | First genome-wide profiling of human knee subchondral bone. | External Validation |
| GSE105027 | Serum & Articular Cartilage | Knee | 12 OA / 12 Control | Agilent Human miRNA Microarray v19.0 | Serum miRNA signature validated in cartilage from the same patients. | miRNA‑CeRNA |
| GSE175959 | Articular Cartilage | Knee | 3 KOA2 / 3 Control | Agilent Human circRNA Microarray V2 | Circular RNA expression analysis in knee cartilage. | circRNA‑CeRNA |
| GSE73626 | Articular Cartilage | Hip & Knee | 11 OA / 7 Control | Illumina HumanMethylation450 BeadChip | DNA methylation differences in hip vs. knee OA cartilage. | Methylation |
| GSE29746 | Synovial Fibroblasts | Multiple | 11 OA / 11 Control | Affymetrix HG-U133 Plus 2.0 | Transcriptomic comparison of synovial fibroblasts in OA and RA. | Validation |
| GSE55457 | Synovial Tissue | Knee | 10 OA / 10 Control | Affymetrix HG-U133 A/B | Transcriptomic profiling distinguishing RA from OA. | Validation |
| GSE114007 | Articular Cartilage | Knee | 20 OA / 18 Control | Illumina HiSeq 2000 / NextSeq 500 (RNA-Seq) | TF3-centric analysis of dysregulated networks in OA cartilage. | Validation |
