# Supplementary material for: Identification and validation of a glutamine metabolism-related gene signature as a diagnostic and therapeutic target in osteoarthritis through integrated multi-omics analysis
Source: PeerJ journal article supplement (doi:10.7717/peerj.20701), 2026-01-30
Supplement: TableS2.docx [file TableS2.docx]

| Gene | Forward primer (5'-3') | Reverse primer (5'-3') |
| --- | --- | --- |
| F13A1 | TGTTCGTGACCTGAAGACTGAC | GTAGACTGCTTCGCTTGACTCG |
| IRS2 | GCAAGCATCGACTTCCTGTCCA | CCAGTGAGGATTTCCTCTGTGG |
| RELA | CCTGAGACAGACTGCCGGAG | CACTGTCACCTGGAAGCAGA |
| B2M | CCACTGAAAAAGATGAGTATGCCT | CCAATCCAAATGCGGCATCTTCA |
| YWHAZ | ACCGTTACTTGGCTGAGGTTGC | CCCAGTCTGATAGGATGTGTTGG |
